# Supplementary material for: Phosphate and ATP uptake by lake bacteria: does taxonomical identity matter?
Source: PubMed Central journal article supplement (PMC5213779; doi:10.1111/1462-2920.13368), 2016-06-08
Supplement: EMI-18-4782-s002.pdf [file EMI-18-4782-s002.pdf]

Supplementary Table 1. Summary of phosphate (Pi) and ATP turnover times (tt) in marine and freshwater ecosystems, as well as in mesocosms experiments and in this study.

| Location          | Study system | Depth, m | Water column      | Pi tt      | ATP tt    | Reference                    |
|-------------------|--------------|----------|-------------------|------------|-----------|------------------------------|
| Alberta, Canada   | 8 Lakes      | 6.2-19.4 | Stratified        | 0.05-0.7 h |           | Prepas 1983                  |
|                   | 10 Lakes     | 2.9-6.4  | Stratified, mixed | 0.03-36 h  |           |                              |
| Canada            | 2 Lakes      | 0-9.5    |                   |            | 0.2-1 h   | Bentzen <i>et al.</i> 1992   |
| Hawaii, USA       | Coastline    | 0.5-1    |                   | 20-61 h    |           | Björkman & Karl 1994         |
| Mediterranean Sea | 9 Stations   | ~50      | mixed             | 2.9-3711 h |           | Zohary & Robarts 1998        |
| Mediterranean Sea | Bay          | 0-30     | Stratified-mixed  | < 2 h      |           | Tanaka <i>et al.</i> 2004    |
|                   | Bay          | 30-75    | stratified        | > 30 h     |           |                              |
| Baltic Sea        | 3 Stations   | 1-2      |                   |            | 5-276 h   | Nausch & Nausch 2006         |
| Baltic Sea        | Mesocosm     |          |                   | 0.02-80 h  | 0.04-8 h  | Løvdaal <i>et al.</i> 2007   |
| Mediterranean Sea | Mesocosm     |          |                   | 1 h        | 3-6 h     | Sebastian <i>et al.</i> 2012 |
| Austria           | Lake PIB     | 1        | Stratified, mixed | 0.2-7 h    | 0.3-9.5 h | This study                   |
| Austria           | Lake GKS     | 1        | Stratified, mixed | 0.3-42 h   | 0.6-30 h  | This study                   |
